# Supplementary material
Source: publisher figshare collection journal article supplement (https://tandf.figshare.com/ndownloader/files/13272824)
Supplement: Supplementary file 1 [file 13272824]

Deciphering the isotopic niches of now-extinct Hispaniolan rodents

SIOBHAN B. COOKE *, 1 and BROOKE E. CROWLEY2

1 Center for Functional Anatomy and Evolution, Johns Hopkins University School of Medicine, Baltimore, MD 21205, USA, [scooke5@jhmi.edu](mailto:scooke5@jhmi.edu);

2 Departments of Geology and Anthropology, University of Cincinnati, Cincinnati Ohio, 45221, U.S.A., [brooke.crowley@uc.edu](mailto:brooke.crowley@uc.edu)

*Corresponding Author

RH: COOKE AND CROWLEY — HISPANIOLAN RODENTS

TABLE 1S. Raw tooth row measurements, body mass estimates, and carbon and oxygen isotope data for each individual.

| **Specimen #** | **Site** | **GPS Coordinates** | **Family** | **Subfamily** | **Taxon** | **Rooted cheek teeth** | **Mandibular tooth row length (TRL; mm)** | **lnBody mass (TRL <5kg)** | **Body mass g (TRL <5kg)** | **lnBody mass (TRL all rodents)** | **Body mass g (TRL all rodents)** | **Part** | **13C (‰)** | **Specimen average 13C (‰)** | **Tip-Base 13C dif (‰)** | **Abs. Tip-Base13C dif (‰)** | **18O tip (‰)** | **Specimen average 18O (‰)** | **Tip-Base 18O dif (‰)** | **Abs. Tip-Base18O dif (‰)** |
| --- | --- | --- | --- | --- | --- | --- | --- | --- | --- | --- | --- | --- | --- | --- | --- | --- | --- | --- | --- | --- |
| UF 293806 | Trou Jean Paul | 18°17'N 72°17'W | Capromyidae | Isolobodontinae | *Isolobodon* sp. (small unidentified species) | N | 13.04 | 6.41 | 606.15 | 6.45 | 633.68 | Tip | -10.7 |  |  |  | -3.7 |  |  |  |
| UF 293806 | Trou Jean Paul | 18°17'N 72°17'W | Capromyidae | Isolobodontinae | *Isolobodon* sp. (small unidentified species) | N | 13.04 | 6.41 | 606.15 | 6.45 | 633.68 | Base | -11.0 | -10.8 | 0.4 | 0.4 | -3.5 | -3.6 | -0.3 | 0.3 |
| UF 293807 | Trou Jean Paul | 18°17'N 72°17'W | Capromyidae | Isolobodontinae | *Isolobodon* sp. (small unidentified species) | N |  |  |  |  |  | Whole | -9.4 | -9.4 |  |  | -2.8 | -2.8 |  |  |
| UF 293832 | Trou Jean Paul | 18°17'N 72°17'W | Capromyidae | Isolobodontinae | *Isolobodon* sp. (small unidentified species) | N | 11.47 | 6.06 | 427.15 | 6.09 | 443.52 | Whole | -10.8 | -10.8 |  |  | -4.8 | -4.8 |  |  |
| UF 293835 | Trou Jean Paul | 18°17'N 72°17'W | Capromyidae | Isolobodontinae | *Isolobodon* sp. (small unidentified species) | N | 11.76 | 6.13 | 457.26 | 6.16 | 475.41 | Tip | -14.0 |  |  |  | -3.4 |  |  |  |
| UF 293835 | Trou Jean Paul | 18°17'N 72°17'W | Capromyidae | Isolobodontinae | *Isolobodon* sp. (small unidentified species) | N | 11.76 | 6.13 | 457.26 | 6.16 | 475.41 | Base | -15.1 | -14.6 | 1.1 | 1.1 | -3.8 | -3.6 | 0.4 | 0.4 |
| UF 293803 | Trou Jean Paul | 18°17'N 72°17'W | Echimyidae | Heteropsomyinae | *Brotomys voratus* | Y |  |  |  |  |  | Tip | -13.6 |  |  |  | -3.9 |  |  |  |
| UF 293803 | Trou Jean Paul | 18°17'N 72°17'W | Echimyidae | Heteropsomyinae | *Brotomys voratus* | Y |  |  |  |  |  | Base | -13.3 | -13.4 | -0.3 | 0.3 | -5.6 | -4.7 | 1.8 | 1.8 |
| UF 293804 | Trou Jean Paul | 18°17'N 72°17'W | Echimyidae | Heteropsomyinae | *Brotomys voratus* | Y | 10.66 | 5.86 | 349.78 | 5.89 | 361.78 | Tip | -13.0 |  |  |  | -3.8 |  |  |  |
| UF 293804 | Trou Jean Paul | 18°17'N 72°17'W | Echimyidae | Heteropsomyinae | *Brotomys voratus* | Y | 10.66 | 5.86 | 349.78 | 5.89 | 361.78 | Base | -12.5 | -12.7 | -0.5 | 0.5 | -3.8 | -3.8 | 0.0 | 0.0 |
| UF 293805 | Trou Jean Paul | 18°17'N 72°17'W | Echimyidae | Heteropsomyinae | *Brotomys voratus* | Y |  |  |  |  |  | Tip | -11.7 |  |  |  | -3.5 |  |  |  |
| UF 293805 | Trou Jean Paul | 18°17'N 72°17'W | Echimyidae | Heteropsomyinae | *Brotomys voratus* | Y |  |  |  |  |  | Base | -11.7 | -11.7 | -0.1 | 0.1 | -4.5 | -4.0 | 0.9 | 0.9 |
| UF 293808 | Trou Jean Paul | 18°17'N 72°17'W | Muridae | Murinae | *Rattus* sp. | Y | 6 | 4.29 | 72.91 | 4.29 | 73.15 | Tip | -15.9 |  |  |  | -3.4 |  |  |  |
| UF 293808 | Trou Jean Paul | 18°17'N 72°17'W | Muridae | Murinae | *Rattus* sp. | Y | 6 | 4.29 | 72.91 | 4.29 | 73.15 | Base | -15.6 | -15.8 | -0.3 | 0.3 | -1.1 | -2.2 | -2.3 | 2.3 |
| UF 293809 | Trou Jean Paul | 18°17'N 72°17'W | Muridae | Murinae | *Rattus* sp. | Y | 6.92 | 4.68 | 107.60 | 4.69 | 108.78 | Tip | -13.3 |  |  |  | -2.2 |  |  |  |
| UF 293809 | Trou Jean Paul | 18°17'N 72°17'W | Muridae | Murinae | *Rattus* sp. | Y | 6.92 | 4.68 | 107.60 | 4.69 | 108.78 | Base | -13.6 | -13.4 | 0.2 | 0.2 | -4.4 | -3.3 | 2.2 | 2.2 |

TABLE 1S. (continued)

| UF 293810 | Trou Jean Paul | 18°17'N 72°17'W | Muridae | Murinae | *Rattus* sp. | Y | 6.18 | 4.37 | 79.04 | 4.37 | 79.42 | Whole | -17.2 | -17.2 |  |  | -3.8 | -3.8 |  |  |
| --- | --- | --- | --- | --- | --- | --- | --- | --- | --- | --- | --- | --- | --- | --- | --- | --- | --- | --- | --- | --- |
| UF 293815 | Trouing Jeremie 5 | 18°21'N 74°1'W | Capromyidae | Hexolobodontinae | *Hexolobodon phenax* | Y | 24.38 | 8.11 | 3342.06 | 8.19 | 3611.63 | Tip | -12.8 |  |  |  | -1.6 |  |  |  |
| UF 293815 | Trouing Jeremie 5 | 18°21'N 74°1'W | Capromyidae | Hexolobodontinae | *Hexolobodon phenax* | Y | 24.38 | 8.11 | 3342.06 | 8.19 | 3611.63 | Base | -12.5 | -12.6 | -0.3 | 0.3 | -1.9 | -1.7 | 0.2 | 0.2 |
| UF 293816 | Trouing Jeremie 5 | 18°21'N 74°1'W | Capromyidae | Hexolobodontinae | *Hexolobodon phenax* | Y | 23.46 | 8.01 | 3009.10 | 8.08 | 3245.18 | Tip | -13.6 |  |  |  | -3.5 |  |  |  |
| UF 293816 | Trouing Jeremie 5 | 18°21'N 74°1'W | Capromyidae | Hexolobodontinae | *Hexolobodon phenax* | Y | 23.46 | 8.01 | 3009.10 | 8.08 | 3245.18 | Base | -13.3 | -13.5 | -0.3 | 0.3 | -4.6 | -4.1 | 1.1 | 1.1 |
| Uf 293817 | Trouing Jeremie 5 | 18°21'N 74°1'W | Capromyidae | Hexolobodontinae | *Hexolobodon phenax* | Y |  |  |  |  |  | Tip | -14.4 |  |  |  | -3.7 |  |  |  |
| Uf 293817 | Trouing Jeremie 5 | 18°21'N 74°1'W | Capromyidae | Hexolobodontinae | *Hexolobodon phenax* | Y |  |  |  |  |  | Base | -14.1 | -14.3 | -0.3 | 0.3 | -2.6 | -3.2 | -1.1 | 1.1 |
| UF 293818 | Trouing Jeremie 5 | 18°21'N 74°1'W | Capromyidae | Isolobodontinae | *Isolobodon montanus* | N | 19.58 | 7.52 | 1837.48 | 7.58 | 1962.75 | Tip | -14.0 |  |  |  | -3.1 |  |  |  |
| UF 293818 | Trouing Jeremie 5 | 18°21'N 74°1'W | Capromyidae | Isolobodontinae | *Isolobodon montanus* | N | 19.58 | 7.52 | 1837.48 | 7.58 | 1962.75 | Base | -13.3 | -13.7 | -0.6 | 0.6 | -3.7 | -3.4 | 0.5 | 0.5 |
| UF 293819 | Trouing Jeremie 5 | 18°21'N 74°1'W | Capromyidae | Isolobodontinae | *Isolobodon montanus* | N |  |  |  |  |  | Tip | -14.3 |  |  |  | -4.5 |  |  |  |
| UF 293819 | Trouing Jeremie 5 | 18°21'N 74°1'W | Capromyidae | Isolobodontinae | *Isolobodon montanus* | N |  |  |  |  |  | Base | -13.2 | -13.7 | -1.1 | 1.1 | -5.2 | -4.9 | 0.7 | 0.7 |
| UF 293841 | Trouing Jeremie 5 | 18°21'N 74°1'W | Capromyidae | Isolobodontinae | *Isolobodon montanus* | N | 19.68 | 7.53 | 1863.20 | 7.60 | 1990.76 | Tip | -11.9 |  |  |  | -3.6 |  |  |  |
| UF 293841 | Trouing Jeremie 5 | 18°21'N 74°1'W | Capromyidae | Isolobodontinae | *Isolobodon montanus* | N | 19.68 | 7.53 | 1863.20 | 7.60 | 1990.76 | Base | -14.4 | -13.2 | 2.5 | 2.5 | -3.4 | -3.5 | -0.1 | 0.1 |
| UF 293820 | Trouing Jeremie 5 | 18°21'N 74°1'W | Capromyidae | Isolobodontinae | *Isolobodon portoricensis* | N | 14.77 | 6.75 | 851.51 | 6.80 | 896.07 | Tip | -14.7 |  |  |  | -4.1 |  |  |  |
| UF 293820 | Trouing Jeremie 5 | 18°21'N 74°1'W | Capromyidae | Isolobodontinae | *Isolobodon portoricensis* | N | 14.77 | 6.75 | 851.51 | 6.80 | 896.07 | Base | -15.7 | -15.2 | 1.0 | 1.0 | -3.8 | -4.0 | -0.4 | 0.4 |
| UF 293821 | Trouing Jeremie 5 | 18°21'N 74°1'W | Capromyidae | Isolobodontinae | *Isolobodon portoricensis* | N | 14.45 | 6.69 | 802.12 | 6.74 | 843.11 | Tip | -13.7 |  |  |  | -4.5 |  |  |  |
| UF 293821 | Trouing Jeremie 5 | 18°21'N 74°1'W | Capromyidae | Isolobodontinae | *Isolobodon portoricensis* | N | 14.45 | 6.69 | 802.12 | 6.74 | 843.11 | Base | -13.5 | -13.6 | -0.2 | 0.2 | -5.4 | -4.9 | 0.9 | 0.9 |
| UF 293842 | Trouing Jeremie 5 | 18°21'N 74°1'W | Capromyidae | Isolobodontinae | *Isolobodon portoricensis* | N | 16.6 | 7.07 | 1171.09 | 7.12 | 1240.03 | Tip | -13.5 |  |  |  | -5.1 |  |  |  |
| UF 293842 | Trouing Jeremie 5 | 18°21'N 74°1'W | Capromyidae | Isolobodontinae | *Isolobodon portoricensis* | N | 16.6 | 7.07 | 1171.09 | 7.12 | 1240.03 | Base | -14.3 | -13.9 | 0.8 | 0.8 | -6.2 | -5.6 | 1.1 | 1.1 |
| UF 293843 | Trouing Jeremie 5 | 18°21'N 74°1'W | Capromyidae | Isolobodontinae | *Isolobodon portoricensis* | N | 15.36 | 6.85 | 947.55 | 6.91 | 999.21 | Tip | -16.2 |  |  |  | -3.1 |  |  |  |
| UF 293843 | Trouing Jeremie 5 | 18°21'N 74°1'W | Capromyidae | Isolobodontinae | *Isolobodon portoricensis* | N | 15.36 | 6.85 | 947.55 | 6.91 | 999.21 | Base | -16.6 | -16.4 | 0.4 | 0.4 | -3.6 | -3.4 | 0.5 | 0.5 |
| UF 293826 | Trouing Jeremie 5 | 18°21'N 74°1'W | Capromyidae | Plagiodontinae | *Plagiodontia aedium* | N | 17.66 | 7.23 | 1386.55 | 7.30 | 1472.99 | Tip | -12.6 |  |  |  | -2.2 |  |  |  |

TABLE 1S. (continued)

| UF 293826 | Trouing Jeremie 5 | 18°21'N 74°1'W | Capromyidae | Plagiodontinae | *Plagiodontia aedium* | N | 17.66 | 7.23 | 1386.55 | 7.30 | 1472.99 | Base | -14.3 | -13.4 | 1.8 | 1.8 | -2.6 | -2.4 | 0.5 | 0.5 |
| --- | --- | --- | --- | --- | --- | --- | --- | --- | --- | --- | --- | --- | --- | --- | --- | --- | --- | --- | --- | --- |
| UF 293827 | Trouing Jeremie 5 | 18°21'N 74°1'W | Capromyidae | Plagiodontinae | *Plagiodontia aedium* | N | 19.51 | 7.51 | 1819.62 | 7.57 | 1943.29 | Tip | -15.8 |  |  |  | -3.0 |  |  |  |
| UF 293827 | Trouing Jeremie 5 | 18°21'N 74°1'W | Capromyidae | Plagiodontinae | *Plagiodontia aedium* | N | 19.51 | 7.51 | 1819.62 | 7.57 | 1943.29 | Base | -15.3 | -15.5 | -0.5 | 0.5 | -3.1 | -3.0 | 0.1 | 0.1 |
| UF 293828 | Trouing Jeremie 5 | 18°21'N 74°1'W | Capromyidae | Plagiodontinae | *Plagiodontia aedium* | N | 18.16 | 7.31 | 1496.29 | 7.37 | 1591.93 | Tip | -13.2 |  |  |  | -4.1 |  |  |  |
| UF 293828 | Trouing Jeremie 5 | 18°21'N 74°1'W | Capromyidae | Plagiodontinae | *Plagiodontia aedium* | N | 18.16 | 7.31 | 1496.29 | 7.37 | 1591.93 | Base | -12.9 | -13.1 | -0.3 | 0.3 | -2.2 | -3.2 | -1.9 | 1.9 |
| UF 293829 | Trouing Jeremie 5 | 18°21'N 74°1'W | Capromyidae | Plagiodontinae | *Plagiodontia aedium* | N |  |  |  |  |  | Tip | -14.5 |  |  |  | -3.4 |  |  |  |
| UF 293829 | Trouing Jeremie 5 | 18°21'N 74°1'W | Capromyidae | Plagiodontinae | *Plagiodontia aedium* | N |  |  |  |  |  | Base | -14.7 | -14.6 | 0.3 | 0.3 | -3.1 | -3.2 | -0.4 | 0.4 |
| UF 293825 | Trouing Jeremie 5 | 18°21'N 74°1'W | Capromyidae | Plagiodontinae | *Plagiodontia spelaeum* | N | 15.56 | 6.89 | 981.59 | 6.94 | 1035.82 | Tip | -16.9 |  |  |  | -3.4 |  |  |  |
| UF 293825 | Trouing Jeremie 5 | 18°21'N 74°1'W | Capromyidae | Plagiodontinae | *Plagiodontia spelaeum* | N | 15.56 | 6.89 | 981.59 | 6.94 | 1035.82 | Base | -17.1 | -17.0 | 0.2 | 0.2 | -3.1 | -3.3 | -0.3 | 0.3 |
| UF 293822 | Trouing Jeremie 5 | 18°21'N 74°1'W | Capromyidae | Plagiodontinae | *Plagiodontia velozi* | N | 28.57 | 8.55 | 5151.46 | 8.63 | 5613.96 | Tip | -13.9 |  |  |  | -1.2 |  |  |  |
| UF 293822 | Trouing Jeremie 5 | 18°21'N 74°1'W | Capromyidae | Plagiodontinae | *Plagiodontia velozi* | N | 28.57 | 8.55 | 5151.46 | 8.63 | 5613.96 | Base | -13.5 | -13.7 | -0.4 | 0.4 | -1.9 | -1.5 | 0.6 | 0.6 |
| UF 293824 | Trouing Jeremie 5 | 18°21'N 74°1'W | Capromyidae | Plagiodontinae | *Plagiodontia velozi* | N | 27.61 | 8.45 | 4692.80 | 8.54 | 5104.86 | Tip | -12.2 |  |  |  | -4.0 |  |  |  |
| UF 293824 | Trouing Jeremie 5 | 18°21'N 74°1'W | Capromyidae | Plagiodontinae | *Plagiodontia velozi* | N | 27.61 | 8.45 | 4692.80 | 8.54 | 5104.86 | Base | -12.9 | -12.6 | 0.6 | 0.6 | -3.5 | -3.8 | -0.5 | 0.5 |
| UF 74968 | Trouing Jeremie 5 | 18°21'N 74°1'W | Capromyidae | Plagiodontinae | *Rhizoplagioontia lemkei* | N | 18.65 | 7.38 | 1609.03 | 7.45 | 1714.29 | Tip | -13.3 |  |  |  | -3.3 |  |  |  |
| UF 74968 | Trouing Jeremie 5 | 18°21'N 74°1'W | Capromyidae | Plagiodontinae | *Rhizoplagioontia lemkei* | N |  |  |  |  |  | Base | -13.5 | -13.4 | 0.3 | 0.3 | -3.7 | -3.5 | 0.4 | 0.4 |
| UF 74971 | Trouing Jeremie 5 | 18°21'N 74°1'W | Capromyidae | Plagiodontinae | *Rhizoplagioontia lemkei* | N | 17.98 | 7.28 | 1456.17 | 7.34 | 1548.43 | Tip | -12.8 |  |  |  | -4.0 |  |  |  |
| UF 74971 | Trouing Jeremie 5 | 18°21'N 74°1'W | Capromyidae | Plagiodontinae | *Rhizoplagioontia lemkei* | N | 17.98 | 7.28 | 1456.17 | 7.34 | 1548.43 | Base | -13.4 | -13.1 | 0.6 | 0.6 | -3.4 | -3.7 | -0.7 | 0.7 |
| UF 74976 | Trouing Jeremie 5 | 18°21'N 74°1'W | Capromyidae | Plagiodontinae | *Rhizoplagioontia lemkei* | N | 19.09 | 7.45 | 1714.72 | 7.51 | 1829.16 | Tip | -13.7 |  |  |  | -2.3 |  |  |  |
| UF 74976 | Trouing Jeremie 5 | 18°21'N 74°1'W | Capromyidae | Plagiodontinae | *Rhizoplagioontia lemkei* | N | 19.09 | 7.45 | 1714.72 | 7.51 | 1829.16 | Base | -13.5 | -13.6 | -0.2 | 0.2 | -2.4 | -2.4 | 0.1 | 0.1 |
| UF 74978 | Trouing Jeremie 5 | 18°21'N 74°1'W | Capromyidae | Plagiodontinae | *Rhizoplagioontia lemkei* | N | 18.97 | 7.43 | 1685.47 | 7.49 | 1797.36 | Tip | -13.2 |  |  |  | -2.3 |  |  |  |
| UF 74978 | Trouing Jeremie 5 | 18°21'N 74°1'W | Capromyidae | Plagiodontinae | *Rhizoplagioontia lemkei* | N | 18.97 | 7.43 | 1685.47 | 7.49 | 1797.36 | Base | -13.4 | -13.3 | 0.2 | 0.2 | -3.4 | -2.9 | 1.1 | 1.1 |
| UF 293811 | Trouing Jeremie 5 | 18°21'N 74°1'W | Echimyidae | Heteropsomyinae | *Brotomys voratus* | Y | 10.29 | 5.76 | 317.65 | 5.79 | 327.93 | Tip | -12.4 |  |  |  | -4.3 |  |  |  |

TABLE 1S. (continued)

| UF 293811 | Trouing Jeremie 5 | 18°21'N 74°1'W | Echimyidae | Heteropsomyinae | *Brotomys voratus* | Y | 10.29 | 5.76 | 317.65 | 5.79 | 327.93 | Base | -12.2 | -12.3 | -0.2 | 0.2 | -4.0 | -4.1 | -0.3 | 0.3 |
| --- | --- | --- | --- | --- | --- | --- | --- | --- | --- | --- | --- | --- | --- | --- | --- | --- | --- | --- | --- | --- |
| UF 293812 | Trouing Jeremie 5 | 18°21'N 74°1'W | Echimyidae | Heteropsomyinae | *Brotomys voratus* | Y | 9.77 | 5.62 | 275.74 | 5.65 | 283.88 | Tip | -13.0 |  |  |  | -4.8 |  |  |  |
| UF 293812 | Trouing Jeremie 5 | 18°21'N 74°1'W | Echimyidae | Heteropsomyinae | *Brotomys voratus* | Y | 9.77 | 5.62 | 275.74 | 5.65 | 283.88 | Base | -12.8 | -12.9 | -0.2 | 0.2 | -4.1 | -4.4 | -0.7 | 0.7 |
| UF 293813 | Trouing Jeremie 5 | 18°21'N 74°1'W | Echimyidae | Heteropsomyinae | *Brotomys voratus* | Y | 10.94 | 5.93 | 375.42 | 5.96 | 388.83 | Whole | -12.7 | -12.7 |  |  | -4.2 | -4.2 |  |  |
| UF 293814 | Trouing Jeremie 5 | 18°21'N 74°1'W | Echimyidae | Heteropsomyinae | *Brotomys voratus* | Y | 9.71 | 5.60 | 271.14 | 5.63 | 279.06 | Whole | -13.0 | -13.0 |  |  | -4.4 | -4.4 |  |  |
| UF 293844 | Trouing Jeremie 5 | 18°21'N 74°1'W | Muridae | Murinae | *Rattus* sp. | Y | 6.8 | 4.63 | 102.59 | 4.64 | 103.61 | Whole | -12.1 | -12.1 |  |  | -2.4 | -2.4 |  |  |
| UF 293845 | Trouing Jeremie 5 | 18°21'N 74°1'W | Muridae | Murinae | *Rattus* sp. | Y | 7.58 | 4.63 | 102.59 | 4.94 | 140.14 | Tip | -10.7 |  |  |  | -1.7 |  |  |  |
| UF 293845 | Trouing Jeremie 5 | 18°21'N 74°1'W | Muridae | Murinae | *Rattus* sp. | Y | 7.58 | 4.93 | 137.97 | 4.94 | 140.14 | Base | -12.5 | -11.6 | 1.8 | 1.8 | -1.9 | -1.8 | 0.2 | 0.2 |
| UF 293846 | Trouing Jeremie 5 | 18°21'N 74°1'W | Muridae | Murinae | *Rattus* sp. | Y | 6.74 | 4.61 | 100.14 | 4.62 | 101.09 | Tip | -13.4 |  |  |  | -2.2 |  |  |  |
| UF 293846 | Trouing Jeremie 5 | 18°21'N 74°1'W | Muridae | Murinae | *Rattus* sp. | Y | 6.74 | 4.61 | 100.14 | 4.62 | 101.09 | Base | -13.3 | -13.4 | -0.1 | 0.1 | -2.1 | -2.1 | -0.1 | 0.1 |
| UF 293847 | Trouing Jeremie 5 | 18°21'N 74°1'W | Muridae | Murinae | *Rattus* sp. | Y | 6.46 | 4.49 | 89.19 | 4.50 | 89.84 | Tip | -12.9 |  |  |  | -3.0 |  |  |  |
| UF 293847 | Trouing Jeremie 5 | 18°21'N 74°1'W | Muridae | Murinae | *Rattus* sp. | Y | 6.46 | 4.49 | 89.19 | 4.50 | 89.84 | Base | -13.1 | -13.0 | 0.1 | 0.1 | -2.7 | -2.8 | -0.3 | 0.3 |
| UF 293823 | Trouing Jeremie 5 | 18°21'N 74°1'W | Capromyidae | Plagiodontinae | *Plagiodontia velozi* | N |  |  |  |  |  | Tip | -11.5 |  |  |  | -2.9 |  |  |  |
| UF 293823 | Trouing Jeremie 5 | 18°21'N 74°1'W | Capromyidae | Plagiodontinae | *Plagiodontia velozi* | N |  |  |  |  |  | Base | -12.6 | -12.4 | -0.5 | 0.6 | -2.2 | -2.6 | -0.5 | 0.3 |

TABLE 2S. Molar measures for a sample of *Rattus* sp. from the US National Museum at the Smithsonian Institution in Washington, D.C.

| **Species** | **Accession #** | **m1 mesiodistal length (mm)** | **m1 buccolingual width (mm)** |
| --- | --- | --- | --- |
| *Rattus rattus* | 103862 | 5.94 | 1.74 |
| *Rattus rattus* | 103861 | 6.02 | 1.85 |
| *Rattus rattus* | 103860 | 5.86 | 1.7 |
| *Rattus rattus* | 103850 | 5.9 | 1.49 |
| *Rattus rattus* | 103852 | 6.57 | 1.73 |
| *Rattus rattus* | 103853 | 6 | 1.5 |
| *Rattus rattus* | 103854 | 5.9 | 1.36 |
| *Rattus rattus* | 103856 | 6.05 | 1.77 |
| *Rattus rattus* | 103858 | 6.35 | 1.58 |
| *Rattus rattus* | 217253 | 6.56 | 1.86 |
| *Rattus rattus* | 217252 | 6.36 | 1.76 |
| *Rattus rattus* | 217251 | 6.73 | 1.71 |
| *Rattus rattus* | 217249 | 6.19 | 1.64 |
| *Rattus rattus* | 217248 | 6.44 | 1.43 |
| *Rattus rattus* | 217247 | 6.41 | 1.78 |
| *Rattus norvegicus* | 147756 | 6.87 | 1.99 |
| *Rattus norvegicus* | 103842 | 6.6 | 1.81 |
| *Rattus norvegicus* | 103846 | 6.88 | 2 |
| *Rattus norvegicus* | 103843 | 6.55 | 1.95 |
